# Supplementary material for: On-chip analysis of C. elegans muscular forces and locomotion patterns in microstructured environments
Source: Royal Society of Chemistry journal article supplement (doi:10.1039/c3lc41403e), 2013-01-01
Supplement: c3lc41403e.pdf [file c3lc41403e.pdf]

**Force measurement model**

**Figure S1: Worm inside PDMS device**

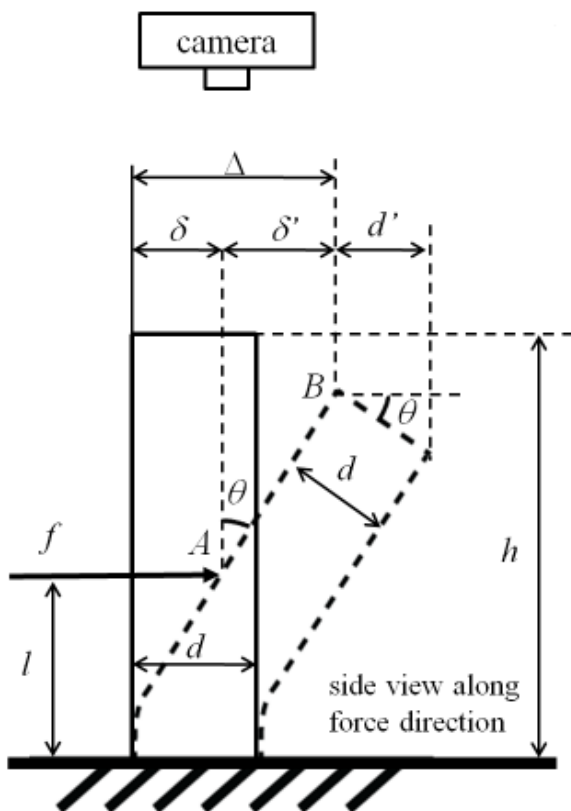

**Figure S2: Worm on different substrate**

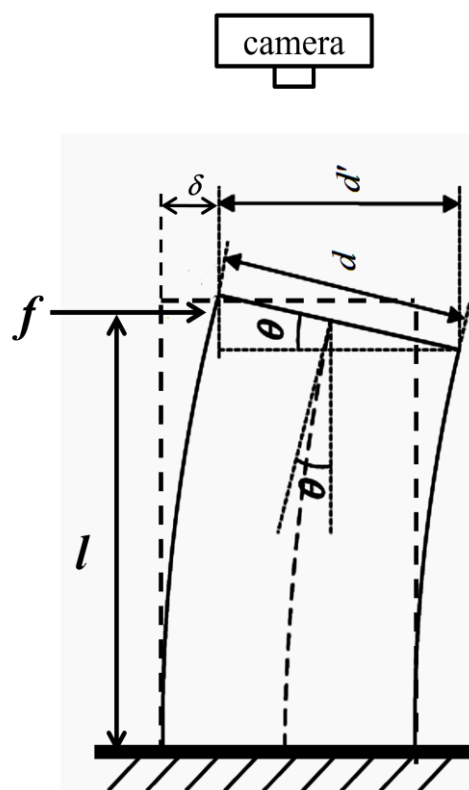

Force,  $f$  is calculated from the deflection  $\Delta$  from the worm contact at the pillar half height and the linear displacement from point A to point B.

$$f = \frac{\Delta}{\left(\frac{l^3}{3EI} + \frac{d^2(1+\gamma)l}{4EI}\right) + \frac{l^2}{2EI}(h-l)}$$

$l$  : pillar height

$I$  : moment of inertia

$E$  : PDMS Young's modulus

$\gamma$  : Poisson's ratio

$d$ : pillar diameter

Force,  $f$  is calculated from the deflection  $\delta$  caused by the worm's contact approximated as a point force at the pillar tip, corresponding to  $h = l$  in the model shown on the left column, thus:

$$f = \frac{\delta}{\left(\frac{l^3}{3EI} + \frac{d^2(1+\gamma)l}{4EI}\right)}$$
